# Supplementary material for: Crows Rival Monkeys in Cognitive Capacity
Source: PubMed Central journal article supplement (PMC5562807; doi:10.1038/s41598-017-09400-0), 2017-08-18
Supplement: 41598_2017_9400_MOESM1_ESM.pdf [file 41598_2017_9400_MOESM1_ESM.pdf]

1 **Crows Rival Monkeys in Cognitive Capacity**

2

3 Dmitry Balakhonov, Jonas Rose\*

4

5

6 *Dept. Of Psychology, Ruhr-University Bochum, 44801 Bochum, Germany.*

7

8 *E-mail (corresponding author): [jonas.rose@ruhr-uni-bochum.de](mailto:jonas.rose@ruhr-uni-bochum.de)*

9

10

11 **Supplementary figures**

12

**Figure S1**

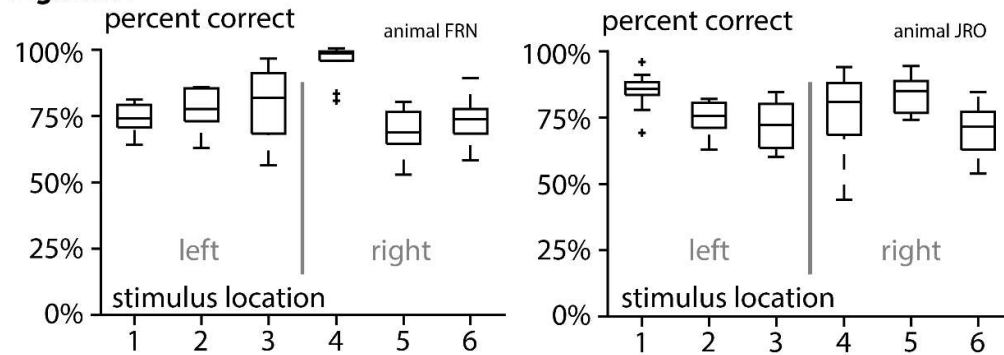

13

14 **Fig. S1. Performance of each crow on attempted trials as a function stimulus-location.** Locations 1, 2 and 3 are  
 15 visible to the left eye, locations 4, 5 and 6 are visible to the right eye. While there are slight differences in  
 16 performance on the different stimulus locations (especially crow FRN, location 4), both animals perform at a high  
 17 level on all locations and with both eyes.

18

**Figure S2**

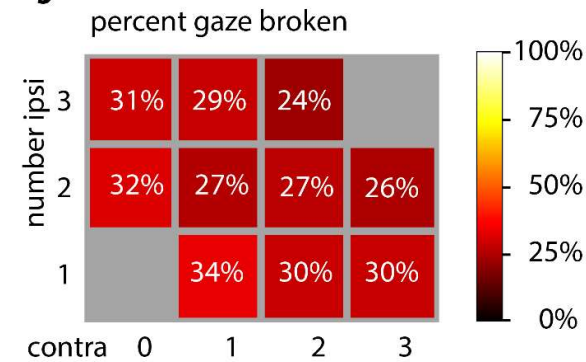

19

20 **Fig. S2. Gaze-breaks are not modulated by number of items ipsilateral/ contralateral to the target.** Gaze-breaks  
 21 of both animals as a function of number of stimuli on target side (number ipsi) and number of items contralateral  
 22 to the target (number contra). Background shading indicates percent correct on attempted trials.

23
